## **Antimicrobial Prescribing Practices at Dermatology Outpatient Departments in Tertiary Care Hospitals: A multi-centered, Cross Sectional Study**

**Nagina Sultana, Jannatul Ferdoush, Fatema Johora, Sharif Mohammad Towfiq Hossain, Arifa Hossain.**

**Authors:** 1. Assistant professor, Department of Dermatology, Marine City Medical College, Chittagong.

2. Associate professor, Department of Pharmacology and therapeutics, BGC Trust Medical College, Chittagong.

3. Associate Professor, Department of pharmacology and therapeutics, Army Medical College Bogura, Bogura.

4. Medical Officer, Department of Endocrine and Metabolism

Chattogram Maa-O-Shishu Hospital Medical College, Chattogram

5. Assistant registrar, Department of Dermatology

Chattogram Maa-O-Shishu Hospital Medical College, Chattogram

5. Lecture, Department of pharmacology, BGC Trust Medical College, Chittagong.

Corresponding Author: Nagina Sultana, Assistant professor, Department of dermatology, Marine City Medical College, Chittagong. Email: [nagina.urmi@gmail.com](mailto:nagina.urmi@gmail.com). Contact no: 01781428995.

### **Abstract:**

Background: The purpose of this study is to evaluate antimicrobial prescribing behaviors in the dermatology outpatient department.

**Methods:** This multi-centered, cross-sectional study was conducted at dermatology outpatient department of three tertiary care hospitals in Chittagong division, Bangladesh during the period October, 2021 to April, 2022.

**Results:** During the study period, 463 prescriptions were obtained. Over half of the participants were female (57%) and between the ages of 21 to 40 years. The majority of patients were diagnosed with eczema (19%), acne (17%), and scabies (15%). Most commonly prescribed antimicrobials was Azithromycin (22%), followed by Permethrin (16%) and Erythromycin (7%). In most cases, antimicrobials were recommended for more than two weeks (60%). Nearly half of the antimicrobials (53 %) were recommended as combination of systemic and topical route.

**Conclusion:** Current study found that dermatologists frequently recommended broad-spectrum antimicrobials for extended periods of time, which may lead to antimicrobial resistance. There is a need for continuing medical education on the appropriate use of antimicrobials, which will result in the effective management of skin diseases.

**Keyword:** antimicrobial, macrolid, prescribing pattern, dermatology, Bangladesh

### **Introduction:**

In Bangladesh, prescribing of different types of medicines are generally irrational.[1,2]. Especially, prescribing antimicrobials at different levels and conditions were found inappropriate in different researches[2, 3] Dermatologists frequently prescribe antibiotics in clinical settings for a multitude of purposes. Because antibiotics constitute a vital point of contact between the physician and the patient, there is an increasing need for their prudent usage. Inappropriate use of antimicrobials contributes to the emergence of resistance [4, 5]. Overuse of antimicrobials has led to development of resistant strains, which has become a global problem [6].

Resistance to antibiotics is a rising concern for the efficacy of therapy in dermatologic and infectious diseases [7]. Dermatologists often prescribe antibiotic regimens that last several months [8-10]. Skin problems account for roughly half of all diseases in the developing world, impacting well over 60% of the community [11]. Almost 80% of the total diseases were scabies and pyogenic infections. Children are particularly vulnerable to skin infection [12]. A community-based survey of South-Asian America reported that fungal infections were common (11%) following acne and eczema [13]. The majority of skin ailments in dermatology OPD are cutaneous infections. Bacteria, mainly gram-positive bacteria, cause the bulk of these cutaneous infections. Gram negative bacteria were responsible for some of these infections [14]. The gram-positive bacteria such as streptococcus pyogens, staphylococcus aureus, and propionobacterium acnes caused an overwhelming number of infections. Gram-negative bacteria such as klebsiella, Bartonella sp, p. aeruginosa, rhinoscleromatis, pasturella multocida, Capnocytophaga canimorsus and vibrio vulnicus produced relatively fewer cutaneous infections [14]. Ringworm and oral candidiasis were the two fungal infections with the highest prevalence [15].

Impetigo contagiosa, folliculitis, acne, and erythema are bacterial skin infections where topical therapy is effective. In cases of severe staphylococcal and streptococcal infections, STDs, secondary bacterial infections, acne vulgaris, rosacea, and dermatosis, where bacterial antigens play a pathogenic role, systemic treatment is essential (psoriasis esp guttate psoriasis). Clindamycin, ciprofloxacin, metronidazole, fusidic acid, and mupirocin are often applied topically in dermatology OPD [9]. Owing to their strong anti-inflammatory actions, oral antimicrobials are widely recommended for acne, rosacea, and various inflammatory disorder [16, 17].

The World Health Organization has long emphasized the necessity of proper antimicrobial administration and use, which is critical in preventing AMR. Globally, 50% of drugs are

incorrectly prescribed, whereas 50% of medicines are misused [18]. As previously stated, irrational antimicrobial prescribing is a universal problem that occurs frequently in clinical practice. Reasons that lead to irrational antimicrobial prescribing include a lack of information about microorganisms, unethical medical marketing, and irrational prescribing behaviors among doctors [19].

This antibiotic use has clinical implications, such as the emergence of resistance [20]. Oral antimicrobial overuse is also linked to major changes in the microbiome, and past antimicrobial exposure is linked to an increased risk of pseudomembranous colitis and other antimicrobial resistant diseases [21,22]. Furthermore, persistent antimicrobial usage has been related to greater risk of colon cancer and breast cancer in some studies [23, 24] which is likely to be mediated by disturbance of the microbiome.

Antibiotic resistance can be controlled by conducting periodic antibiotic-containing prescription audits to analyze and amend. It provided an important educational tool to reduce antimicrobial overuse and misuse, minimize adverse effects, essential drug selection, improve therapeutic efficacy, reduce adverse effects, minimize treatment cost, deliver useful feedback to clinicians, and estimate community drug need, all of which had a positive impact on treatment standards [25]. This, in turn, will improve prescribing habits and improve the efficient management of prevalent skin disorders at a lesser cost.

The purpose of the current study was to describe dermatologists' prescribing patterns and appropriate use of antimicrobials in order to create baseline data that will assist dermatological prescribers in providing reasonable treatment to their patients.

## **Materials and Methods:**

**Study place and duration:** A cross-sectional, multi-centered, descriptive study was undertaken in the outpatient department of Dermatology in three govt. affiliated tertiary care hospitals (BGC Trust medical College, Marine City Medical College and Chattogram Maa-O-Shishu Hospital Medical College) in Chittagong division, Bangladesh from October 2021 to May 2022. Ethical approval was taken from Institutional Review Board (IRB) of BGC Trust Medical College.

**Study procedure:** Total of 463 prescriptions containing antibiotics were recruited in the study. The study included new patients who came to the dermatology outpatient department, but not those who were admitted during their visit. The prescriptions were thoroughly reviewed, and relevant data was collected, including demographic details, diagnosis, and the name, duration and formulation of the antimicrobials prescribed for the infection. All of the information was gathered, collected, tabulated, and assessed. Data quality was ensured through extensive checks for duplicate and missing values, as well as prompt correction of any errors. The information was presented as a percentage and also as a total figure. A Microsoft Excel 2010 spreadsheet was used to analyze the results.

## **Results:**

The study comprised 463 prescriptions from dermatology outpatient department patients that included antimicrobials. Demographic characteristics of study population are illustrated in Table I. The majority of the patients (58%, 269/463) were between the ages of 21 to 24 years. Among them 57% (266/463) were female patient.

Table I: Participants' demographic information

| <b>Demographic characteristics</b> | <b>No of patients<br/>(n=463)</b> | <b>Percentage (%)</b> |
|------------------------------------|-----------------------------------|-----------------------|
| <b>Age (years)</b>                 |                                   |                       |

|               |     |    |
|---------------|-----|----|
| <20           | 58  | 13 |
| 21-40         | 269 | 58 |
| 41-60         | 87  | 19 |
| >60           | 49  | 11 |
| <b>Gender</b> |     |    |
| Male          | 197 | 43 |
| Female        | 266 | 57 |

Table II showed that most common indication of antimicrobial prescribing were eczema 19% (87/463), acne vulgaris 17% (79/463), scabies 15% (76/463), allergic Contact dermatitis 8% (37/463)

Table II: Dermatological conditions indicated for antimicrobials (n=463)

| Dermatological Indication   | Total No of patient |                |
|-----------------------------|---------------------|----------------|
|                             | Frequency           | Percentage (%) |
| Eczema                      | 87                  | 19             |
| Acne vulgaris               | 79                  | 17             |
| Scabies                     | 76                  | 15             |
| Allergic Contact dermatitis | 37                  | 8              |
| Impetigo                    | 16                  | 3              |
| Insect bite                 | 5                   | 1              |
| Folliculitis                | 9                   | 2              |
| Atopic dermatitis           | 19                  | 4              |
| Tinia corporis              | 24                  | 5              |

|                          |    |    |
|--------------------------|----|----|
| Tinea cruris             | 18 | 4  |
| Pityriasis versicolor    | 17 | 4  |
| Prurigo Simplex          | 7  | 2  |
| Seborrheic dermatitis    | 23 | 5  |
| Furuncle and curbancler  | 4  | 1  |
| Psoriasis                | 18 | 4  |
| Vulvovaginal candidiasis | 11 | 2  |
| Alopecia areata          | 2  | .4 |
| Candida intertrigo       | 3  | .6 |
| Paronychia               | 8  | 2  |

Table III showed that most frequently used antimicrobials were Azythromycin 22% (104/463), permethrin 16% (76/463), Erythromycin 7% (33/463).

Table III: Antimicrobials prescribed in dermatology out-patient department (n=463)

| Antimicrobials             | Frequency | Percentage (%) |
|----------------------------|-----------|----------------|
| Azythromycin               | 104       | 22             |
| Permethrin                 | 76        | 16             |
| Erythromycin               | 33        | 7              |
| Doxycycline                | 23        | 5              |
| Cefuroxime+Clavulanic acid | 6         | 1              |
| Gentamicin                 | 5         | 1              |
| Flucloxacilin              | 21        | 5              |
| Mupirocin                  | 25        | 5              |
| Clotrimazole               | 4         | 1              |

|               |    |   |
|---------------|----|---|
| Acyclovir     | 11 | 2 |
| Metronidazole | 11 | 2 |
| Voriconazole  | 16 | 3 |
| Luliconazole  | 15 | 3 |
| Fluconazole   | 19 | 4 |
| Ketoconazole  | 23 | 5 |
| Itraconazole  | 12 | 3 |
| Terbinafine   | 13 | 3 |
| Clindamycin   | 14 | 3 |
| Tolnaftate    | 6  | 1 |
| Cefuroxime    | 11 | 2 |

Table IV showed the distribution of antimicrobials according to the routes of delivery. A combined route (systemic and topical) was given in 53% (232/463) encounters, followed by an oral route in 25% of cases. In terms of duration of usage, 60% (277/463) of participants prescribed antimicrobials for less than one week, whereas 40% (186/463) for more than two weeks.

Table IV: Routes of administration of antimicrobials (n=463)

| Routes of administration           | Frequency | Percentage |
|------------------------------------|-----------|------------|
| Oral                               | 118       | 25         |
| Per-enteral                        | 00        | 0          |
| Topical                            | 103       | 22         |
| Combination (systemic and topical) | 232       | 53         |

---

Duration of use

---



---

|          |     |    |
|----------|-----|----|
| >2 weeks | 186 | 40 |
| ≤1 weeks | 277 | 60 |

## **Discussion:**

In light of the widespread global antimicrobial resistance, irrational antibiotic prescribing is a major source of concern. The foremost goal of dermatological treatment is to prescribe the least and safest antimicrobials possible. The problem is exacerbated by the illogical and inappropriate usage of antimicrobials. Therefore, the objective of the study was to evaluate prescribing pattern of antimicrobials by dermatologist. In this study, a high number of patients (58%) were between the ages of 21 and 24, and more than half of the participants (57%) were female.

In the current study, eczema accounted for 19% of antimicrobial prescriptions, followed by acne vulgaris (17%), and scabies (15%). Bahelah SO et al study also revealed similar to this study [26] According to Jannat et al study, scabies was the most frequent reason for dermatological disease seen in hospitals' outpatient departments, followed by dermatitis, folliculitis, urticaria, impetigo, psoriasis, acne, and melasma. [27]

The most frequently antimicrobials recommended in this study were azythromycin (22%), permethrin (16%), and erythromycin (7%). The most regularly recommended antibiotics were Macrolids (33.2 %), followed by penicillin (24.7%), and according to a study conducted by Bahelah SO et al.[26] Macrolides are frequently recommended, maybe because they have fewer adverse effects. The most commonly recommended antimicrobial medicines for skin infections are beta-lactam medications (penicillin, cephalosporin) and Macrolides, according to prior studies [28-30].

In this study, dermatologists preferred the combination route (systemic and local) 53 %, followed by oral route, which was recommended in 25% encounters . Concomitant usage systemic and topical antimicrobials for acne should be avoided, according to several studies, because it increases the risk of multidrug-resistant organisms and gives no further benefit. [ 31,32]

Topical antibiotics provide a number of advantages, including a reduction in oral antibiotic misuse, a reduction in bacterial resistance, and the avoidance of systemic toxicity and side effects. [33]

Furthermore, several study suggest that topical antimicrobials are more efficacious than systemic antimicrobials of skin infections like impetigo, and that they should be used first.[konnoing] [34]

The use of topical antimicrobial is limited in the current study, which is regarded unreasonable, yet in our circumstance, many patients presented with widespread lesions as well as poor hygienic environment.

As a result, dermatologists have no choice except to prescribe oral antimicrobials, either alone or in combination with topical antimicrobials, in these circumstances. Prescribers should stop prescribing fixed dose combinations of topical medicines containing antimicrobials, antifungals, and steroids, which could minimize antimicrobial use in dermatology.

In terms of antimicrobial use duration, the current study found that 60% of antimicrobials were prescribed for more than one week. In contrast to the current study, the Bahelah et al [26] finding revealed the duration of antimicrobial use, with the majority of cases being treated for one week (78.4 %).

Antibiotic use for an extended period of time is one of the variables that leads to the emergence of resistant bacteria. This finding is comparable to the findings of Anuj Kumar Pathak et al study [35].

The study has a few shortcomings. Only antimicrobial prescribing in dermatological outpatients was observed. Dermatology patients admitted as in-patient department were not included. Safety of antimicrobial use was not investigated.

Conclusion: Dermatologists are increasingly prescribing broad-spectrum and long-acting antimicrobials, according to the findings of current study, placing patients at risk for adverse effects and perhaps leading to antimicrobial resistance. Dynamic educational approaches should be used in order to avoid needless and prolonged antimicrobial use. This findings will help dermatologists to prescribe with more precision. In order to determine the effectiveness of this approach in terms of patient outcomes and antibiotic stewardship, further research is required.

#### Reference:

1. Rahman MS, Begum M., Khan IA, Chowdhury S, Islam AMZ, Sultana R, Hoque, MZ, Akhter N. A Baseline Survey on the Use of Drugs at Private Practitioner Level in Bangladesh. Bangladesh Journal of Physiology and Pharmacology. 1998;14:47-50.
2. Baqui QBOF, Hiron MM, Begum HA, Begum ZA, Choudhury SAR. Pattern of drug used in Enteric Fever by Graduate and rural medical prescriber. Bangladesh Journal of Physiology and Pharmacology. 1999;15:24-6.
3. Siddika AN. 2012. Antimicrobial Prescribing Pattern in Bangabandhu Sheikh Mujib Medical University Hospital: Assessment of the Compliance with Antibiotic Guideline, MPhil Thesis, Bangabandhu Sheikh Mujib Medical University, Shahbag, Dhaka, Bangladesh.
4. World Health Organization (WHO). 2003. Implementation Workshop on the WHO Global Strategy for containment of Antimicrobial Resistance. World Health Organization, Geneva, Switzerland, WHO/CDS/CSR/RMD/2003.7

5. Rahman MS, Huda S. Antimicrobial resistance and related issues: An overview of Bangladesh situation. *Bangladesh Journal of Pharmacology*. 2014; 9: 218-24.
6. Spellberg B, Guidos R, Gilbert D, Bradley J, Boucher HW, Scheld WM, Bartlett G, Edwards J Jr. The epidemic of Antibiotic - Resistant Infections: A Call to Action for the Medical Community from the Infectious Diseases Society of America. *Clinical Infectious Diseases*. 2008; 46;155-64.
7. Luk NM, Hui M, Lee HC, et al. Antibiotic-resistant *Propionibacterium acnes* among acne patients in a regional skin centre in Hong Kong. *J Eur Acad Dermatol Venereol*. 2013;27(1):31-36. doi:10.1111/j.1468-3083.2011.04351.x [PubMed] [CrossRef] [Google Scholar]
8. Centers for Disease Control and Prevention Outpatient antibiotic prescriptions: United States, 2013. [https://www.cdc.gov/antibiotic-use/community/pdfs/Annual-ReportSummary\\_2013.pdf](https://www.cdc.gov/antibiotic-use/community/pdfs/Annual-ReportSummary_2013.pdf). Updated October 1, 2018. Accessed November 17, 2018.
9. Straight CE, Lee YH, Liu G, Kirby JS. Duration of oral antibiotic therapy for the treatment of adult acne: a retrospective analysis investigating adherence to guideline recommendations and opportunities for cost-savings. *J Am Acad Dermatol*. 2015;72(5):822-827. doi:10.1016/j.jaad.2015.01.048
10. Barbieri JS, Hoffstad O, Margolis DJ. Duration of oral tetracycline-class antibiotic therapy and use of topical retinoids for the treatment of acne among general practitioners (GP): a retrospective cohort study. *J Am Acad Dermatol*. 2016;75(6):1142-1150.
9. Chakrawarty R, Jaiswal MK, Sharma S, Sachdev D, Sharma R, Ali SS. Study on prescription pattern of antibiotics in Dermatology OPD of a tertiary care teaching hospital of tribal region of India. *IJBR*. 2017;8(08):491-6.

10. Saravanakumar RT, Prasad GS, Ragul G, Mohanta GP, Manna PK, Moorthi C. Study of prescribing pattern of topical corticosteroids in the department of dermatology of a multispecialty tertiary care teaching hospital in south India. *Int J Pharm Sci Res.* 2012;3(4):685-7.
11. Narwane SP, Patel TC, Shetty YC, Chikhalkar SB. Drug Utilization and Cost Analysis for Common Skin Diseases in Dermatology OPD of an Indian Tertiary Care Hospital - A Prescription Survey. *Br. J. Pharm. Res.* 2011; 1(1): 9-18
12. Khanum H, Alam S. Occurrence of Scabies among the Out-patient Children of Dhaka Medical College, Dhaka. *Bangladesh J Zool.* 2010;38(1): 7-11.
13. Shah SK, Bhanusali DG, Sachdev A, Geria AN, Alexis AF. A survey of skin conditions and concerns in South Asian Americans: a community-based study. *J Drugs Dermatol.* 2011 May;10(5):524-8. PMID: 21533300.
14. Chiller K, Selkin BA, Murakawa GJ. Skin microflora and bacterial infections of the skin. *J Investig Dermatol Symp Proc.* 2001; 6(3):170-4.
15. Sarker F, Akter T, Musa S, Bhuiyan AI, Khan MM, Khanum H. Fungal Skin Diseases and Related Factors in Outpatients of Three Tertiary Care Hospitals of Dhaka, an Urban City of Bangladesh: Cross-Sectional Study. *Biomed J Sci& Tech Res.* 2021; 39(1):30926-33.
16. Monk E, Shalita A, Siegel DM. Clinical applications of non-antimicrobial tetracyclines in dermatology. *Pharmacol Res.* 2011;63(2):130-145. doi:10.1016/j.phrs.2010.10.007
17. Barbieri JS, James WD, Margolis DJ. Trends in prescribing behavior of systemic agents used in the treatment of acne among dermatologists and nondermatologists: a retrospective analysis, 2004-2013. *J Am Acad Dermatol.* 2017;77(3):456-463.e4.
18. Summoro TS, Gidebo KD, Kanche ZZ, Woticha EW. Evaluation of trends of drug-prescribing patterns based on WHO prescribing indicators at outpatient departments of four hospitals in southern Ethiopia. *Drug Des. Devel. Ther.* 2015; 9: 4551–4557

19. Dutta S, Beg MA, Kumar S, Bawa S, Mehta AK, Anjoom M, Sindhu S. Morbidity profile and drug utilization pattern in allergic diseases in skin. *J Pharmacol Toxicol Stud.* 2014; 2(3):31– 6
20. Adler BL, Kornmehl H, Armstrong AW. Antibiotic resistance in acne treatment. *JAMA Dermatol.* 2017;153(8):810-811.
21. Dantes R, Mu Y, Hicks LA, et al. Association between outpatient antibiotic prescribing practices and community-associated *Clostridium difficile* infection. *Open Forum Infect Dis.* 2015;2(3):ofv113
22. Bryce A, Hay AD, Lane IF, Thornton HV, Wootton M, Costelloe C. Global prevalence of antibiotic resistance in paediatric urinary tract infections caused by *Escherichia coli* and association with routine use of antibiotics in primary care: systematic review and meta-analysis. *BMJ.* 2016;352:i939.
23. Cao Y, Wu K, Mehta R, et al. . Long-term use of antibiotics and risk of colorectal adenoma. *Gut.* 2018;67(4):672-678.
24. Velicer CM, Heckbert SR, Lampe JW, Potter JD, Robertson CA, Taplin SH. Antibiotic use in relation to the risk of breast cancer. *JAMA.* 2004;291(7):827-835.
25. Sweileh WM. Audit of prescribing practices of topical corticosteroids in outpatient dermatology clinics in north Palestine. *Eastern Mediterr Health J.* 2006; 12(1/2):161-69.
26. Bahelah SO, Abdo GM. Prescription Patterns of Antibiotics in Five Dermatologic Outpatient Clinics: A Cross Sectional Study from Yemen. *Journal of Pharmacy Practice and Community Medicine.* 2016;2(3):65-9.
27. Jannat T, Shahriar I, Islam B, Rowshan MM, Sumi SA, Jabeen L. Evaluation of Drug Prescribing Patterns in Dermatology Outpatient Department of Two Teaching Hospitals in Bangladesh. *Delta Med Col J.*2022;8(1):9-14.

28. Stevens DL, Bisno AL, Chambers HF, Dellinger EP, Goldstein EJ, Gorbach SL. Practice guidelines for the diagnosis and management of skin and soft-tissue infections. *Clinical Infect Dis*. 2005;41(10):1373-406.
29. Moon KT. Which antibiotics are best for skin and soft tissue infections?. *Am Fam Physician*. 2007;76(7):1034-38.
30. Hanifin JM, Rogge JL. Staphylococcal infections in patients with atopic dermatitis. *Arch Dermatol*. 1977;113(10):1383-6.
31. Chon SY, Doan HQ, Mays RM, Singh SM, Jordon RA, Tyring SK. Antibiotic over use and resistance in dermatology. *Dermatological Therapy*. 2012;25(1):55-69.
32. Dreno B, Bettoli V, Ochsendorf F, Layton A, Mobacken H, Degreef H. European recommendations on the use of oral antibiotics for acne. *Eur J Dermatol*. 2004;14:391-9.
33. Swartz MN. Clinical practice: cellulites. *N Engle J Med*. 2004;350(9):904-12
34. Koning S, Vander Wouden JC, Chosidow O. Efficacy and safety of Retapamulin ointment as treatment of impetigo: Randomized double-blind multicenter placebo-controlled trial. *Pr J Dermatol*. 2008;158 (5);1077-82.
35. Pathak AK, Kumar S, Kumar M, Mohan L, Dikshit H. Study of drug utilization pattern for skin diseases in dermatology OPD of an Indian tertiary care hospital-A prescription survey. *Journal of clinical and diagnostic research: JCDR*. 2016;10(2):FC01-FC05.
